# Supplementary material for: mTOR-dependent phosphorylation controls TFEB nuclear export
Source: PubMed Central journal article supplement (PMC6098152; doi:10.1038/s41467-018-05862-6), 2018-08-17
Supplement: 41467_2018_5862_MOESM1_ESM.pdf [file 41467_2018_5862_MOESM1_ESM.pdf]

Supplementary information

**mTOR-dependent phosphorylation controls TFEB nuclear export**

Napolitano et al.

# Supplementary Fig. 1

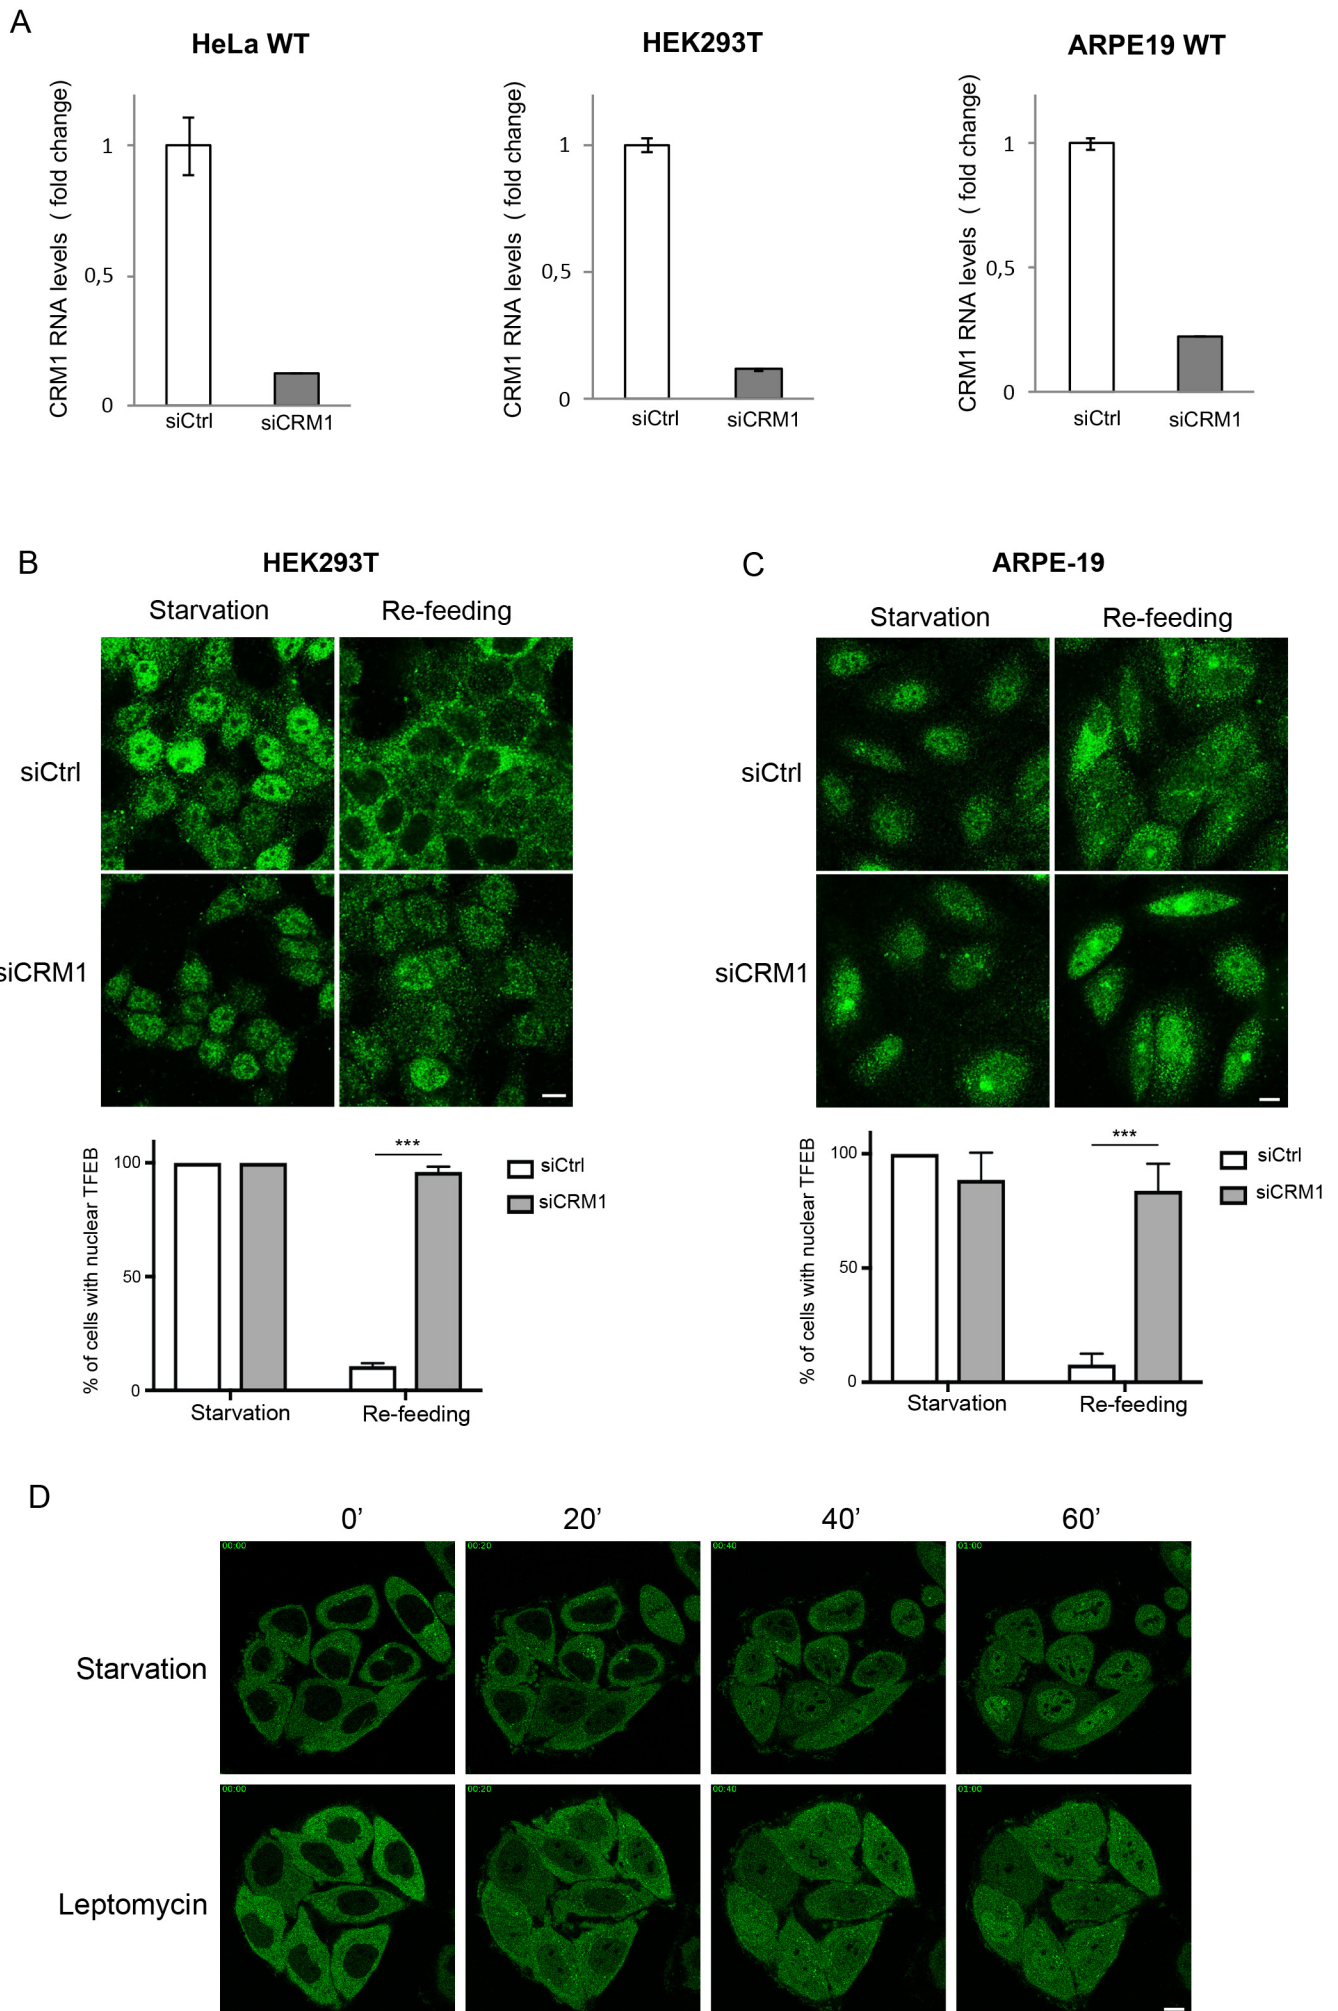

**Supplementary Fig. 1.** TFEB undergoes CRM1-dependent nuclear export. **A.** Quantitative RT-PCR showing CRM1 knockdown efficiency in HeLa, HEK293T and ARPE 19 cells. **B.** HEK293T cells transfected with siRNA directed against CRM1 (siCRM1) or with control siRNA (siCtrl) were either starved for 60 min (starvation), or starved and re-stimulated with amino acids for 30 min and analysed by confocal microscopy. Cells were analysed to calculate the percentage of cells showing nuclear TFEB localization. Results are mean  $\pm$  SEM.  $n > 70$  cells per condition.  $***P < 0.001$ , Two-way Anova. **C.** ARPE-19 cells were treated and analysed by confocal microscopy as in B. Cells were analysed to calculate the percentage of cells showing nuclear TFEB localization. Results are mean  $\pm$  SEM.  $n > 30$  cells per condition.  $***P < 0.001$ , Two-way Anova. **D.** Time-lapse imaging of HeLa cells stably expressing GFP-TFEB, either starved of amino acids or treated with 5nM Leptomycin B in the presence of nutrients, and imaged every 2 minutes by airyscan microscopy. Representative images at the indicated time points are shown.

## Supplementary Fig. 2

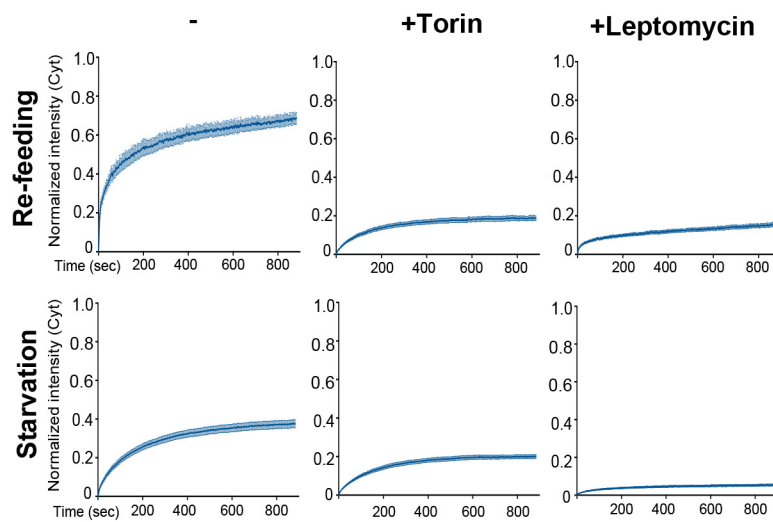

### Supplementary Fig. 2. Kinetic analysis of TFEB nucleo-cytoplasmic shuttling.

Cells described in Fig. 2B and 2C were analysed and plotted for the recovery of TFEB cytosolic fluorescence using the Image J software. The plots show the normalized fluorescence recovery starting from the first frame after photobleaching for each treatment. Results are mean  $\pm$  SEM.  $n > 6$  cells per condition.

## Supplementary Fig. 3

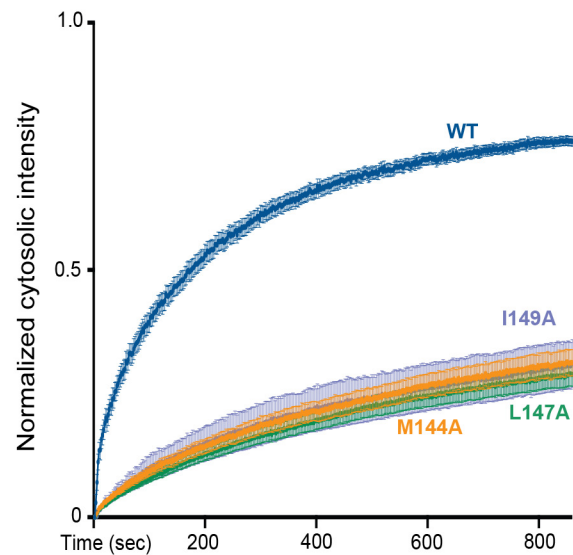

**Supplementary Fig. 3.** TFEB NES-mutants show impaired nuclear export kinetics. Cells described in Fig. 3E were analysed and plotted for the recovery of TFEB cytosolic fluorescence using the Image J software. The plot shows the normalized fluorescence recovery starting from the first frame after photobleaching. Results are mean  $\pm$  SEM.  $n > 12$  cells per condition.

## Supplementary Fig. 4

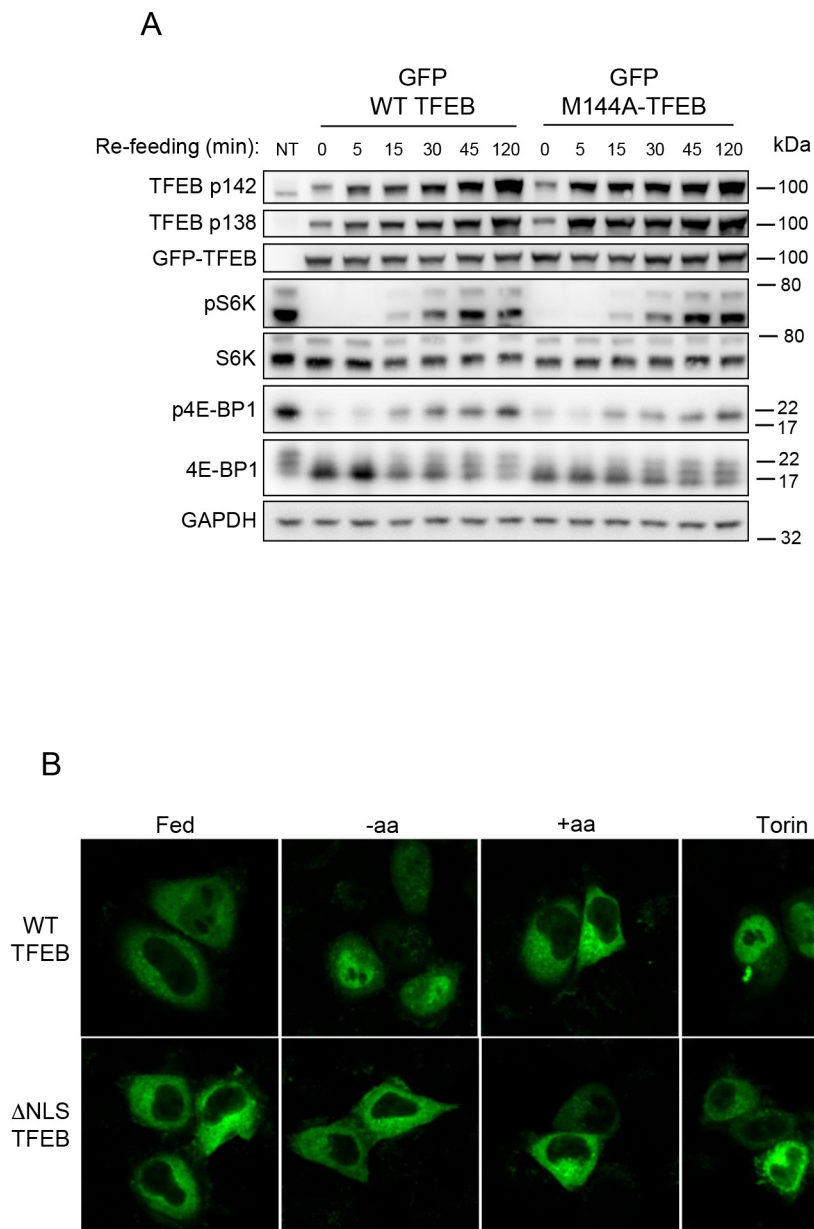

### Supplementary Fig. 4. Characterization of TFEB mutants.

**A.** HeLa cells transfected with either wild type GFP-TFEB or M144A-GFP-TFEB were either starved for 60 min or starved and re-stimulated with amino acids the indicated time points and evaluated for TFEB phosphorylation by immunoblotting. **B.** Confocal microscopy analysis of HeLa cells transfected with either GFP-WT-TFEB or GFP- $\Delta$ NLS-TFEB and either left untreated (Fed), starved of amino acids for 60 min (-aa), or starved and re-stimulated with amino acids for 30 min in the presence or absence of Torin.

# Supplementary Fig. 5

## High nutrients

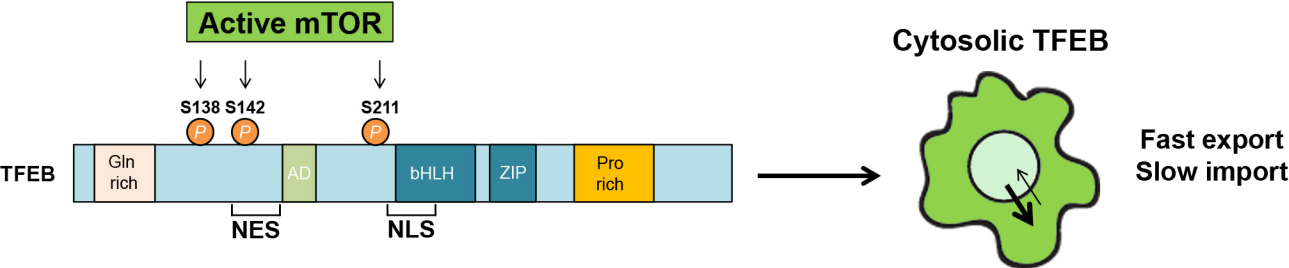

## Low nutrients

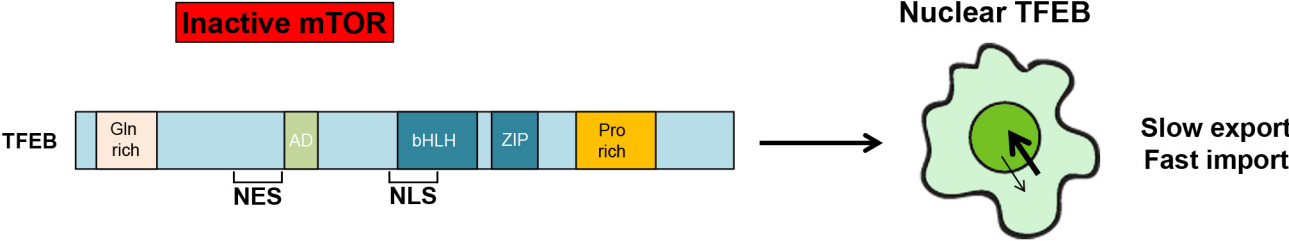

### Supplementary Fig. 5

Proposed mechanism of TFEB nucleo-cytoplasmic shuttling by mTOR-dependent phosphorylation.

# Supplementary Fig. 6

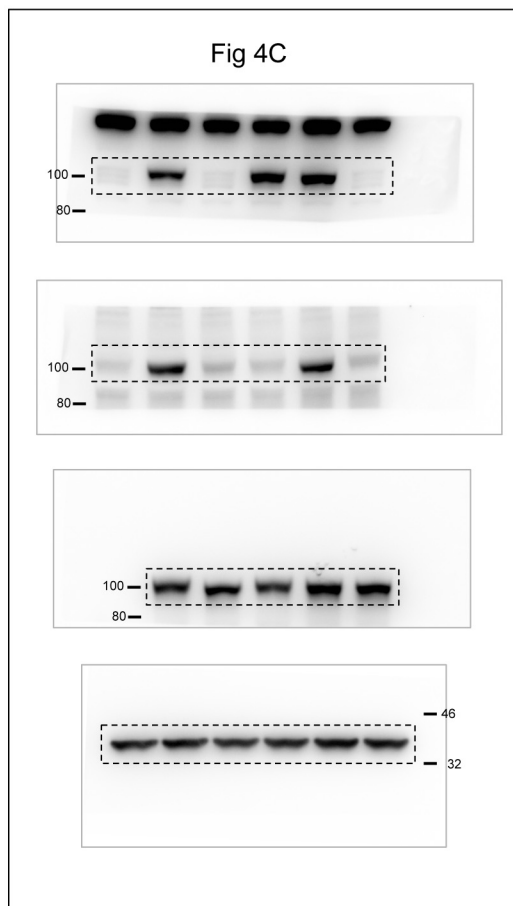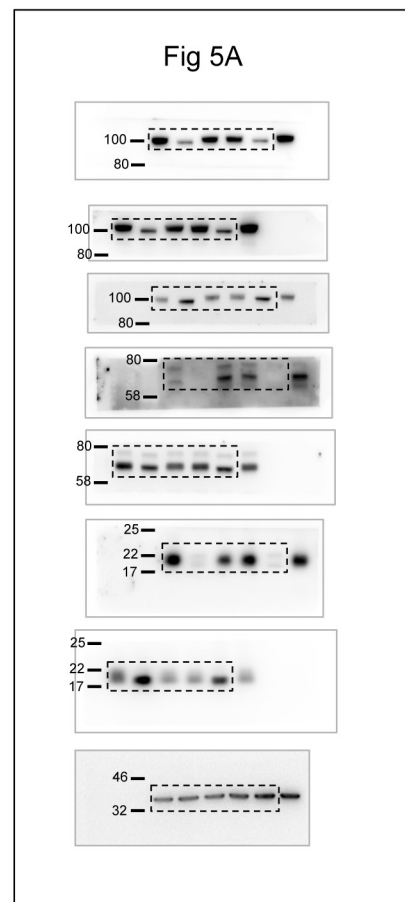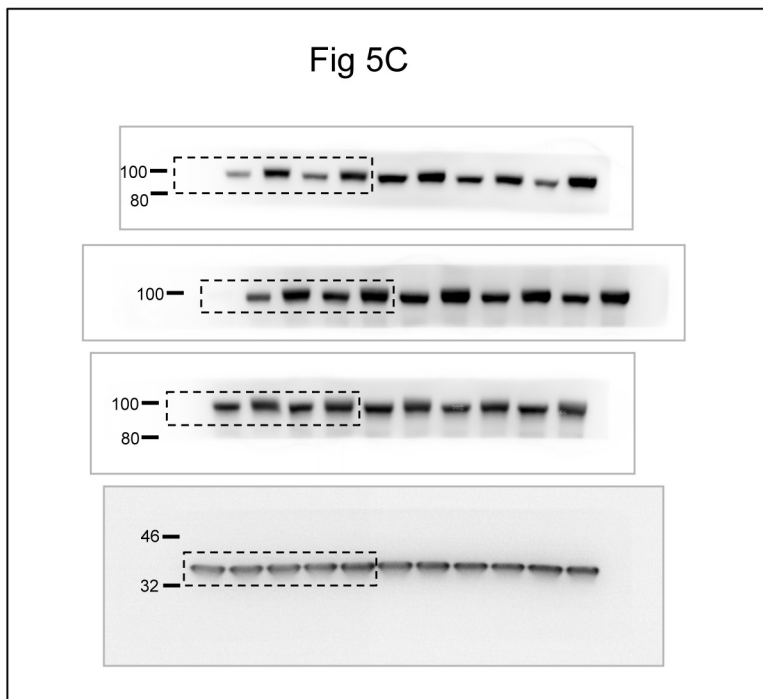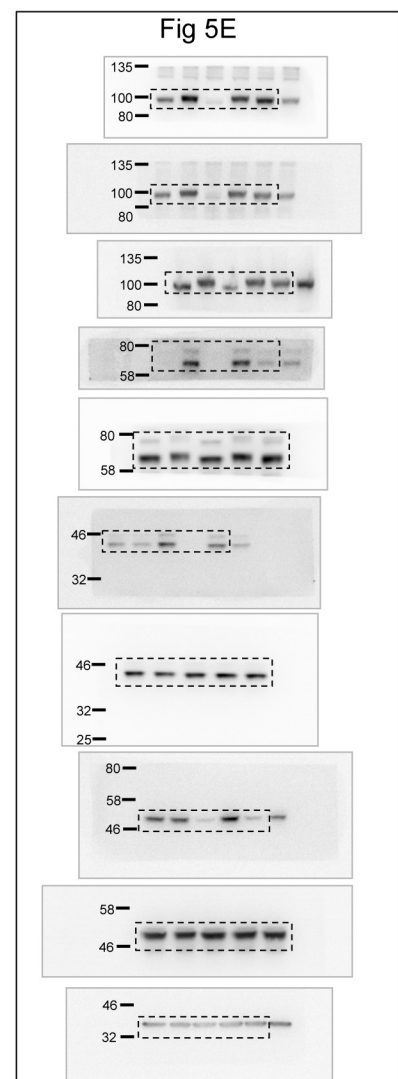

**Supplementary Fig. 6**  
Uncropped original western blots.
